# Supplementary material for: Synthesis and Cytostatic Effect of 3’-deoxy-3’-C-Sulfanylmethyl Nucleoside Derivatives with d-xylo Configuration
Source: MDPI journal article supplement (doi:10.3390/molecules24112173), 2019-06-10

# Supporting Information

## **Synthesis and cytostatic effect of 3'-deoxy-3'-C-sulfanylmethyl nucleoside derivatives with D-xylo configuration**

*Miklós Bege<sup>1</sup>, Alexandra Kiss<sup>2</sup>, Máté Kicsák<sup>1</sup>, Ilona Bereczki<sup>1</sup>, Baksa Viktória<sup>2</sup>, Gábor Király<sup>2</sup>, Gábor Szemán-Nagy<sup>2</sup>, M. Zsuzsa Szigeti<sup>2</sup>, Pál Herczegh<sup>1</sup>, Anikó Borbás<sup>1\*</sup>,*

1: Department of Pharmaceutical Chemistry, University of Debrecen, 4032 Debrecen, Egyetem tér 1, Hungary

2: Department of Biotechnology and Microbiology, University of Debrecen, Hungary

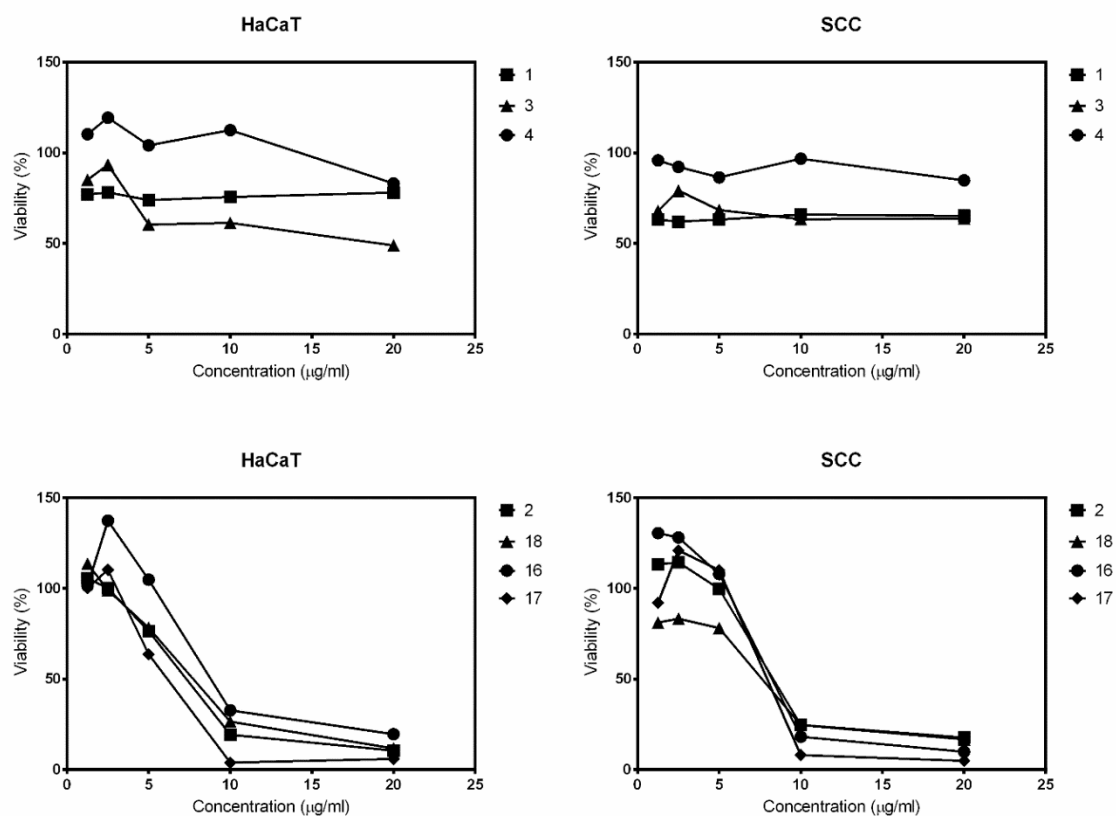

**Figure S1:** Concentration dependent effect of compounds 1, 3 and 4 (upper diagrams) and compounds 2, 16, 17 and 18. on cell viability.

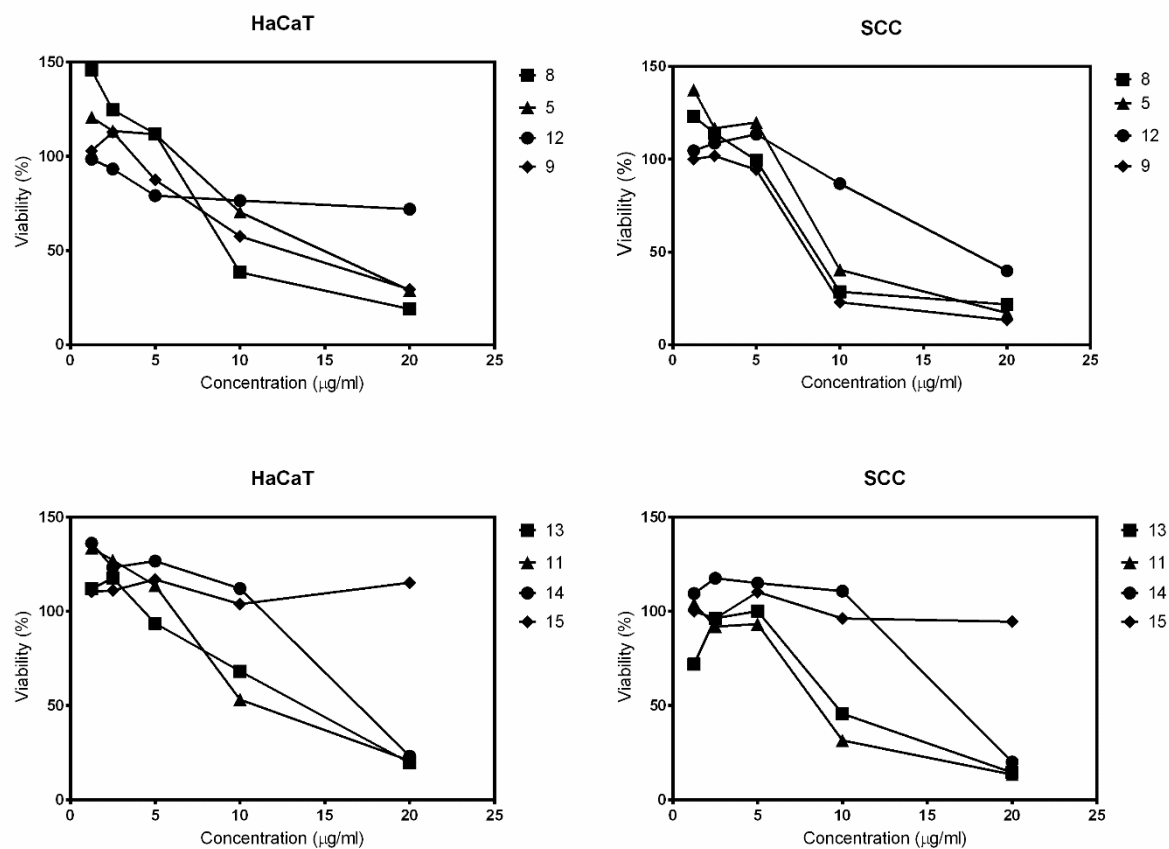

**Figure S2:** Concentration dependent effect of compounds **5**, **8**, **9**, and **12** (upper diagrams) and compounds **11**, **13**, **14** and **15** on cell viability

<sup>1</sup>H and <sup>13</sup>C NMR spectra of compounds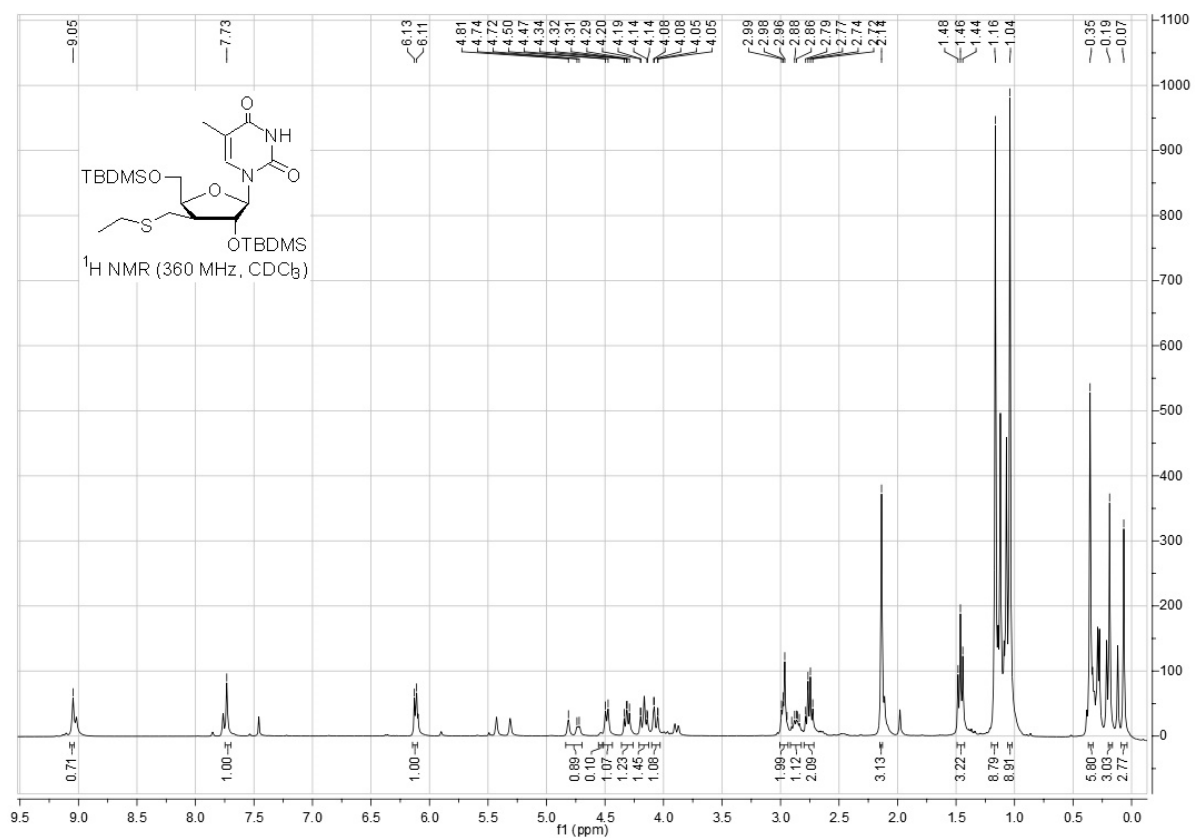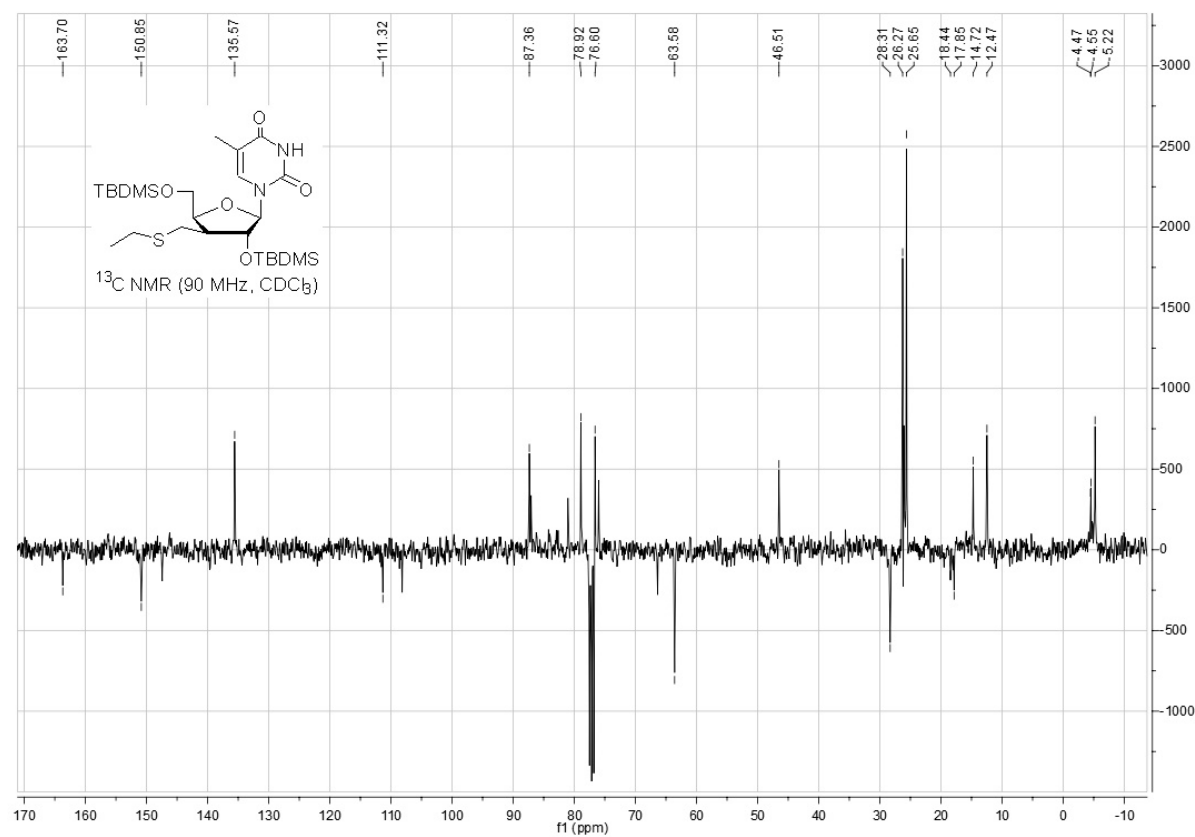

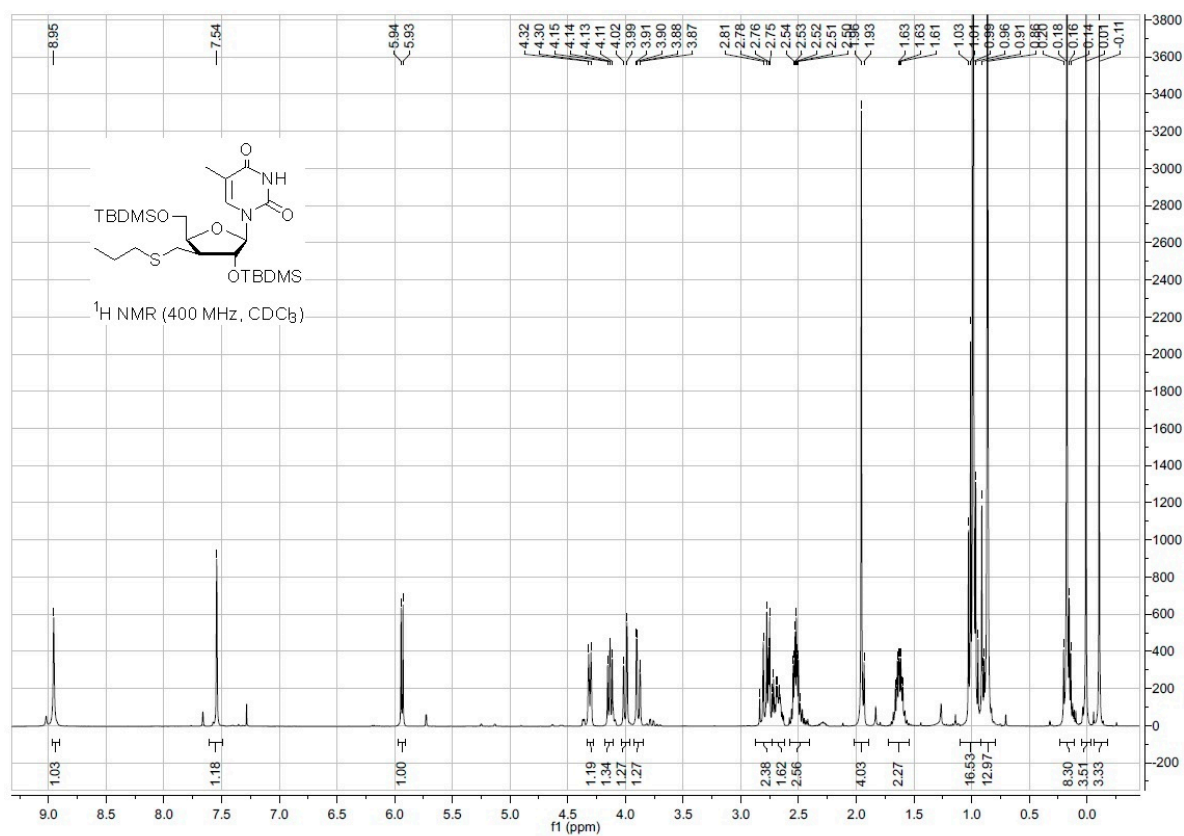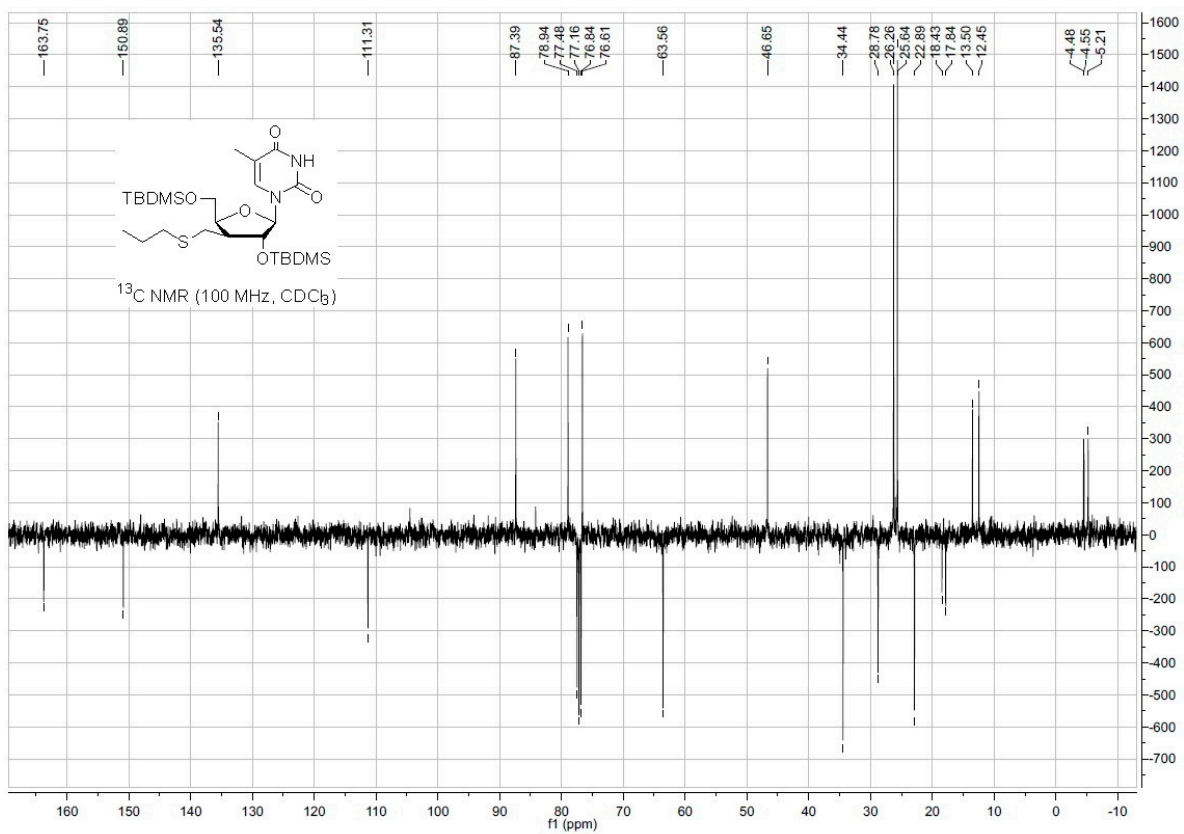

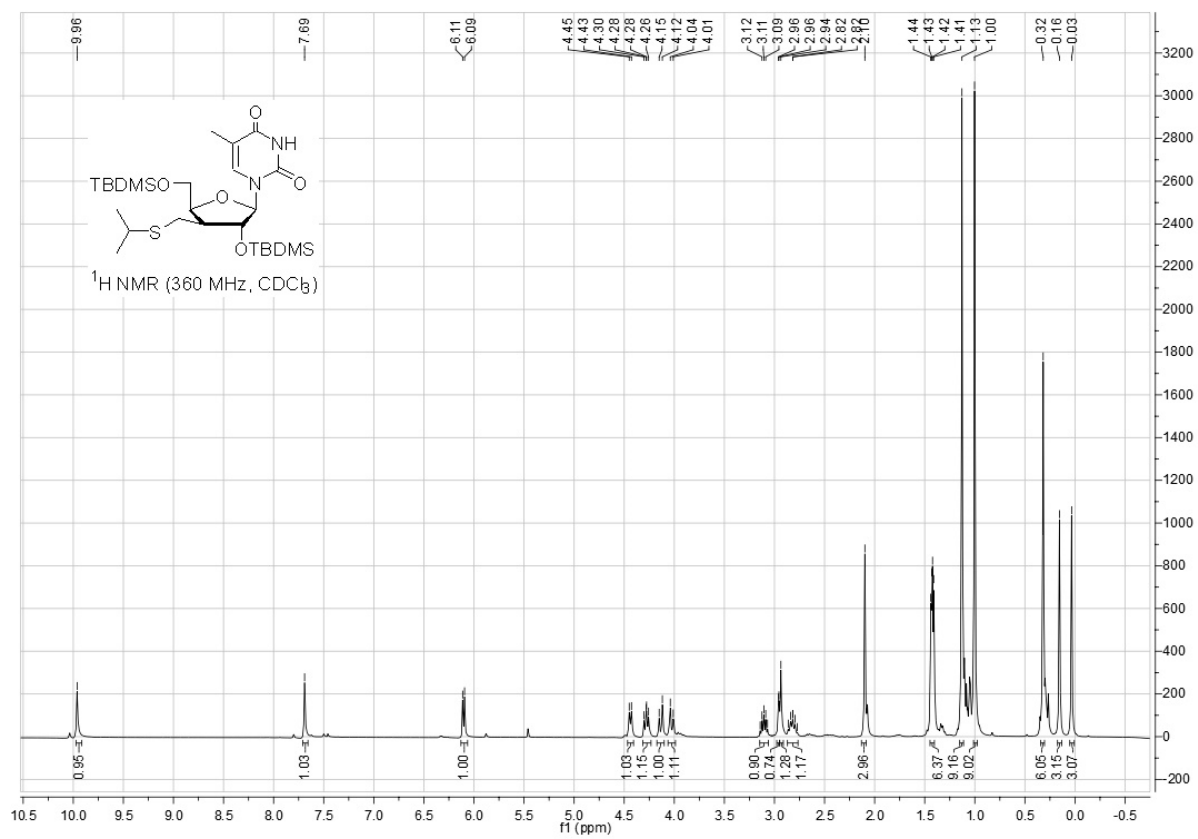

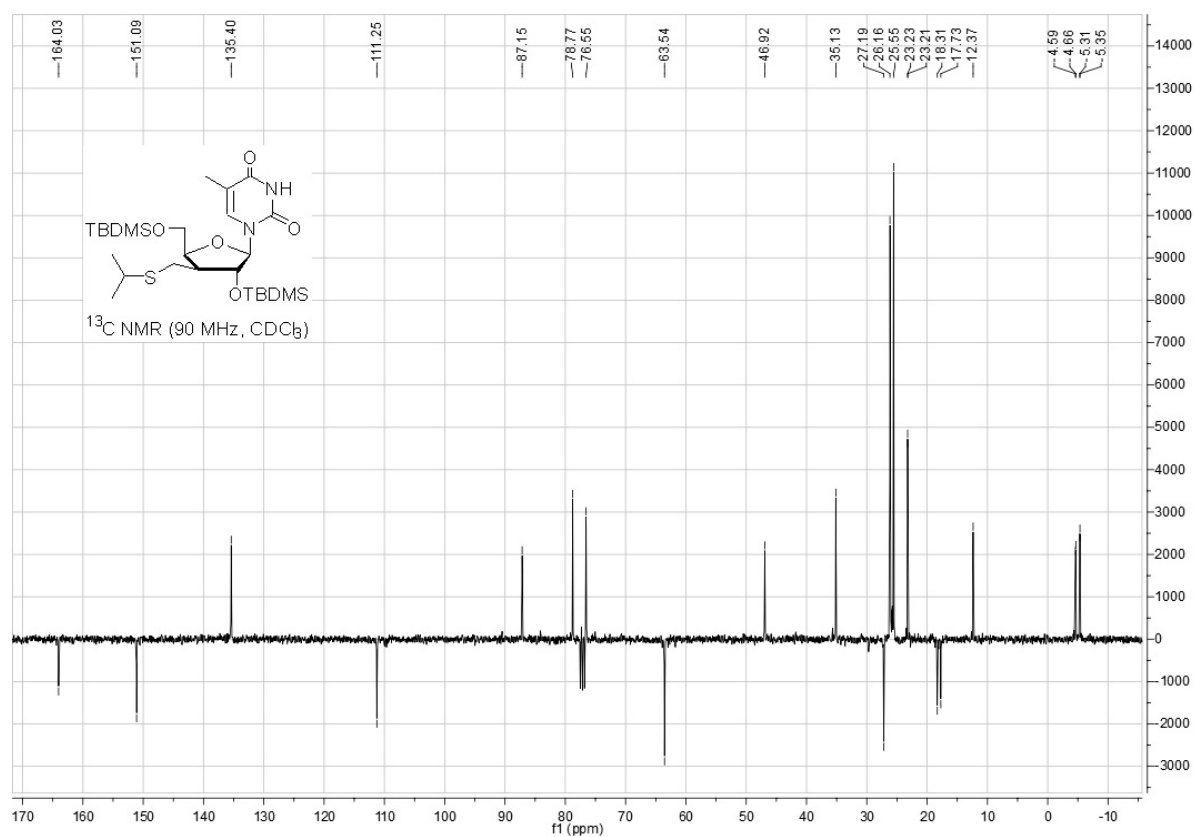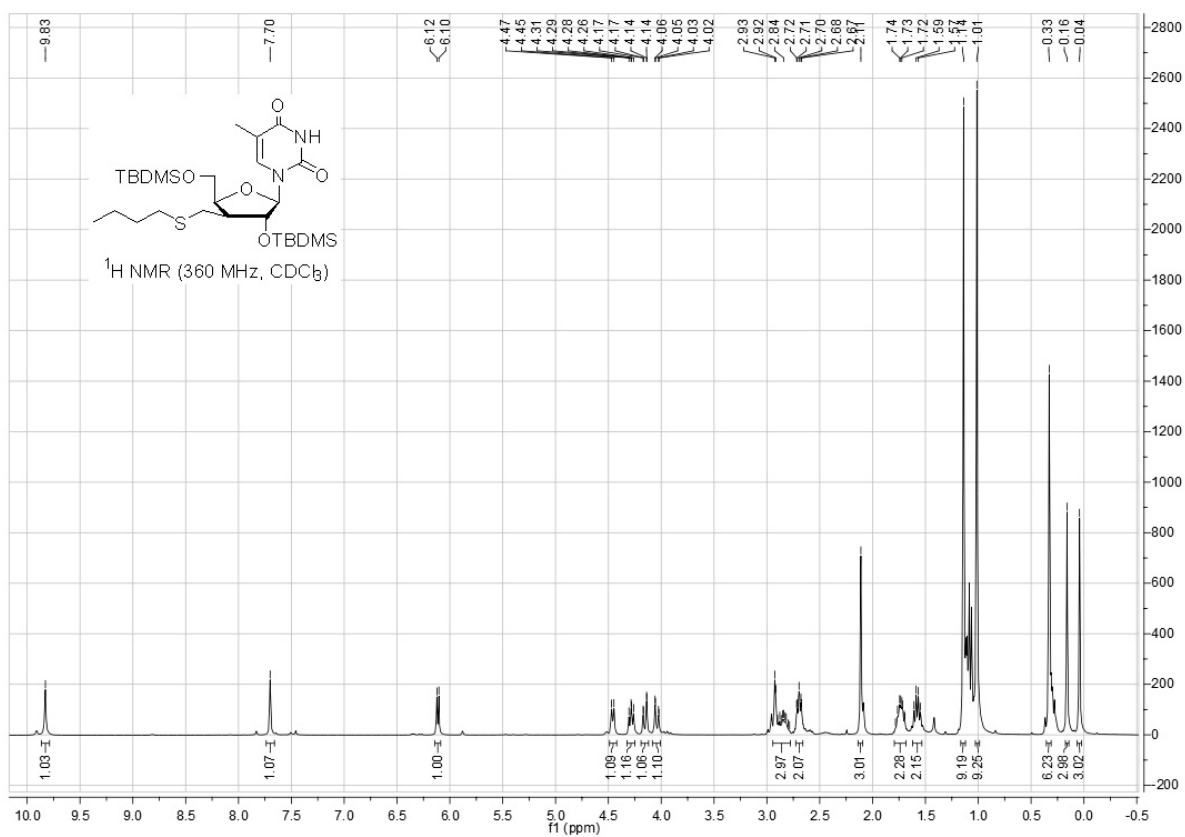

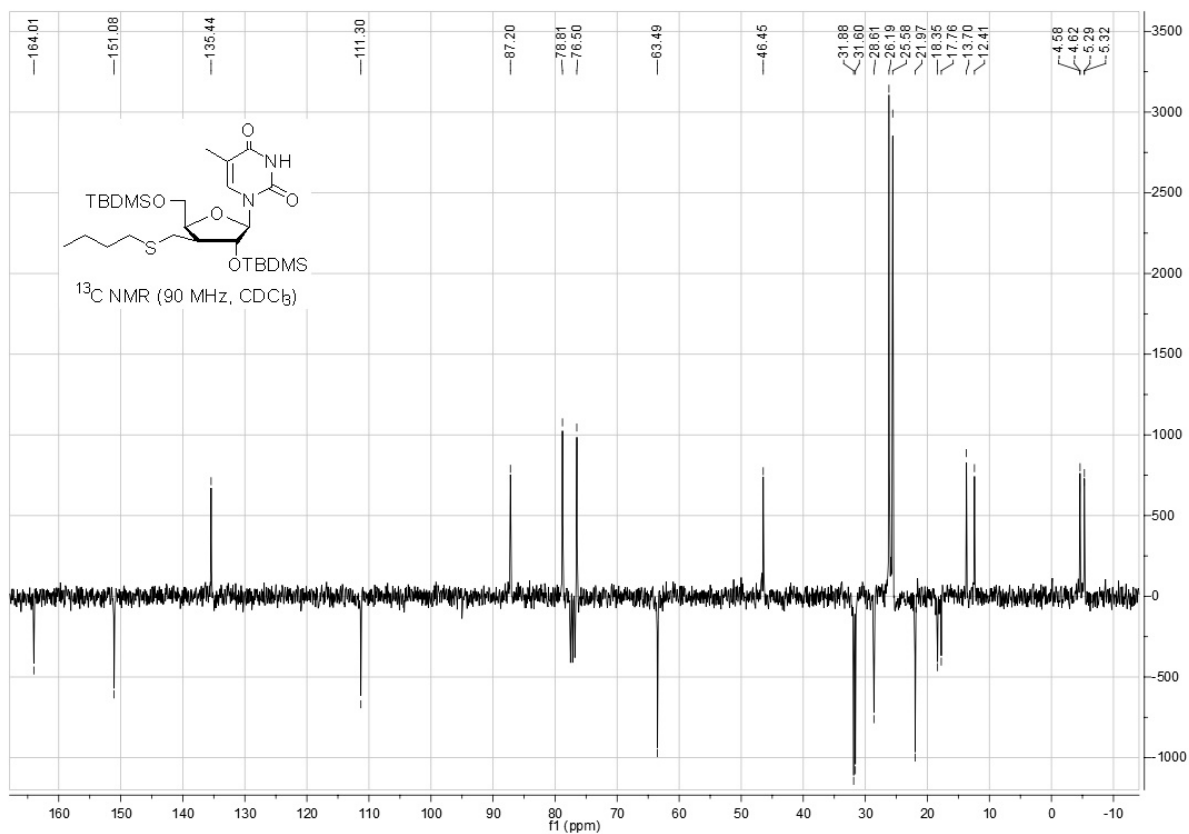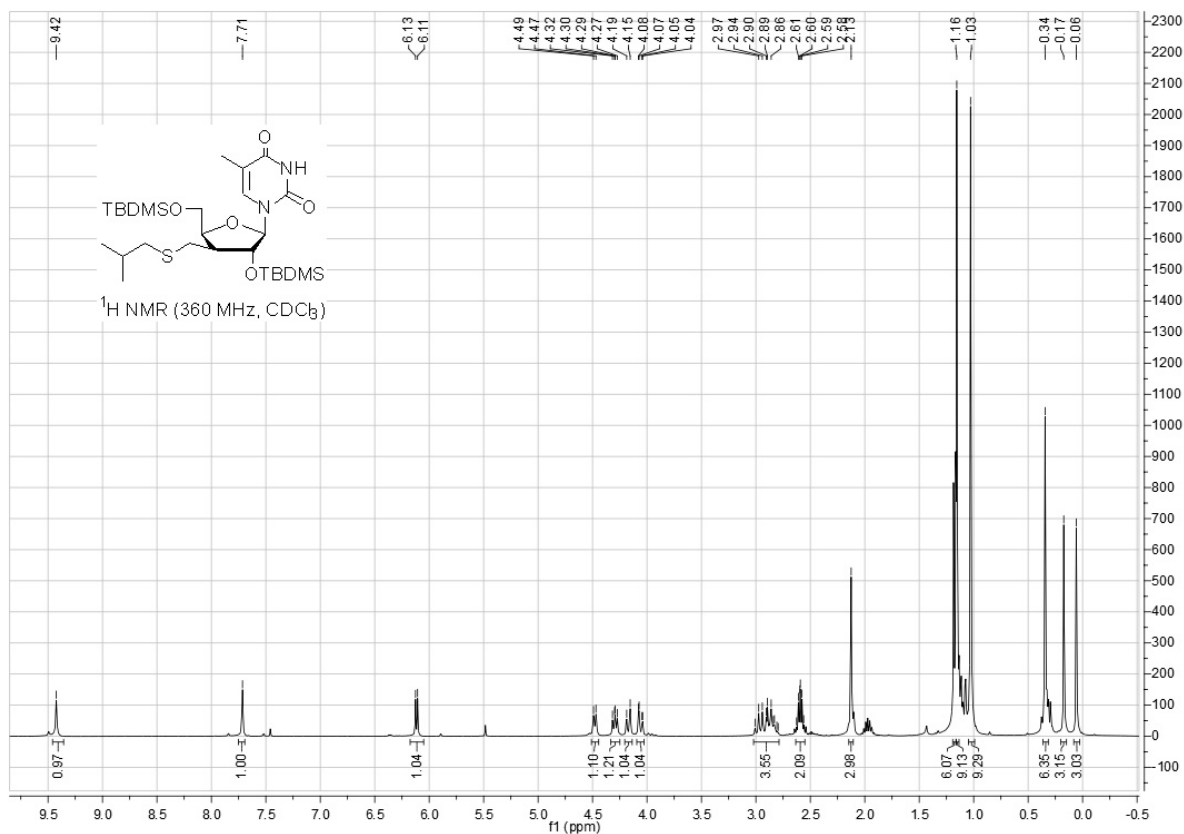



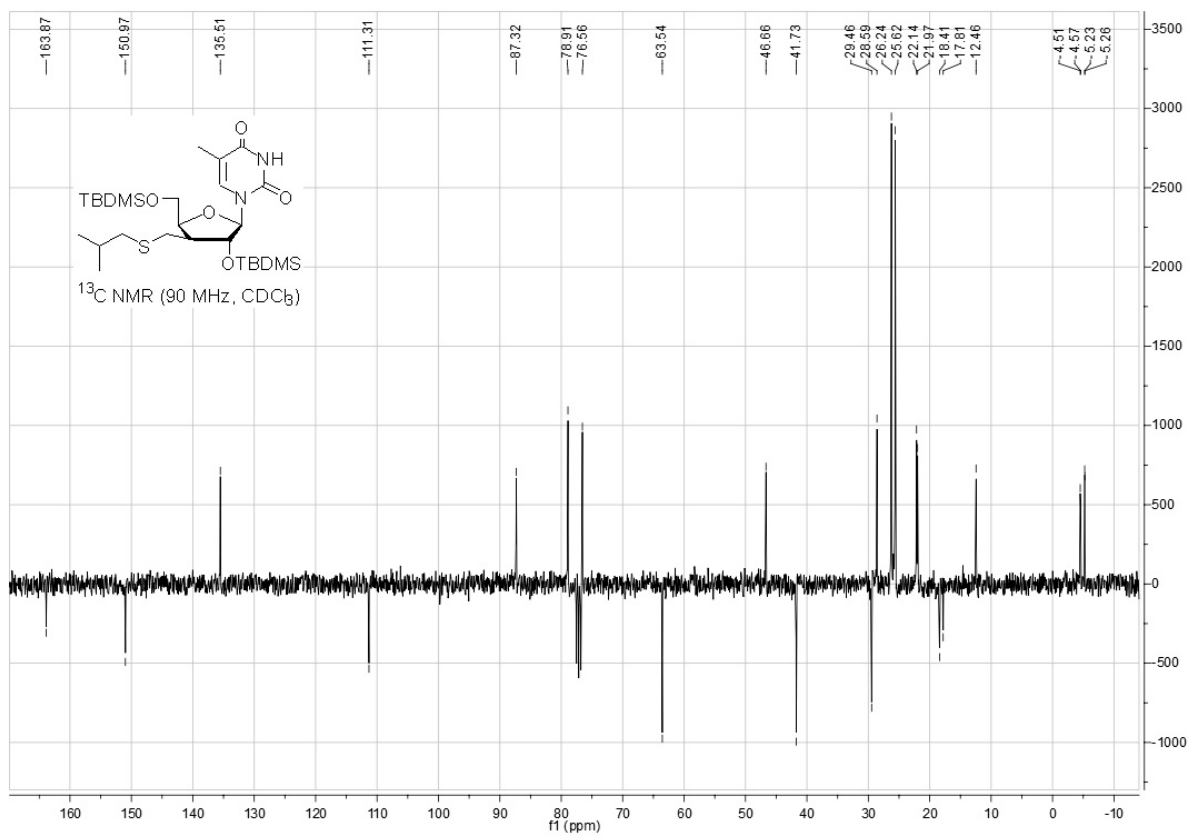

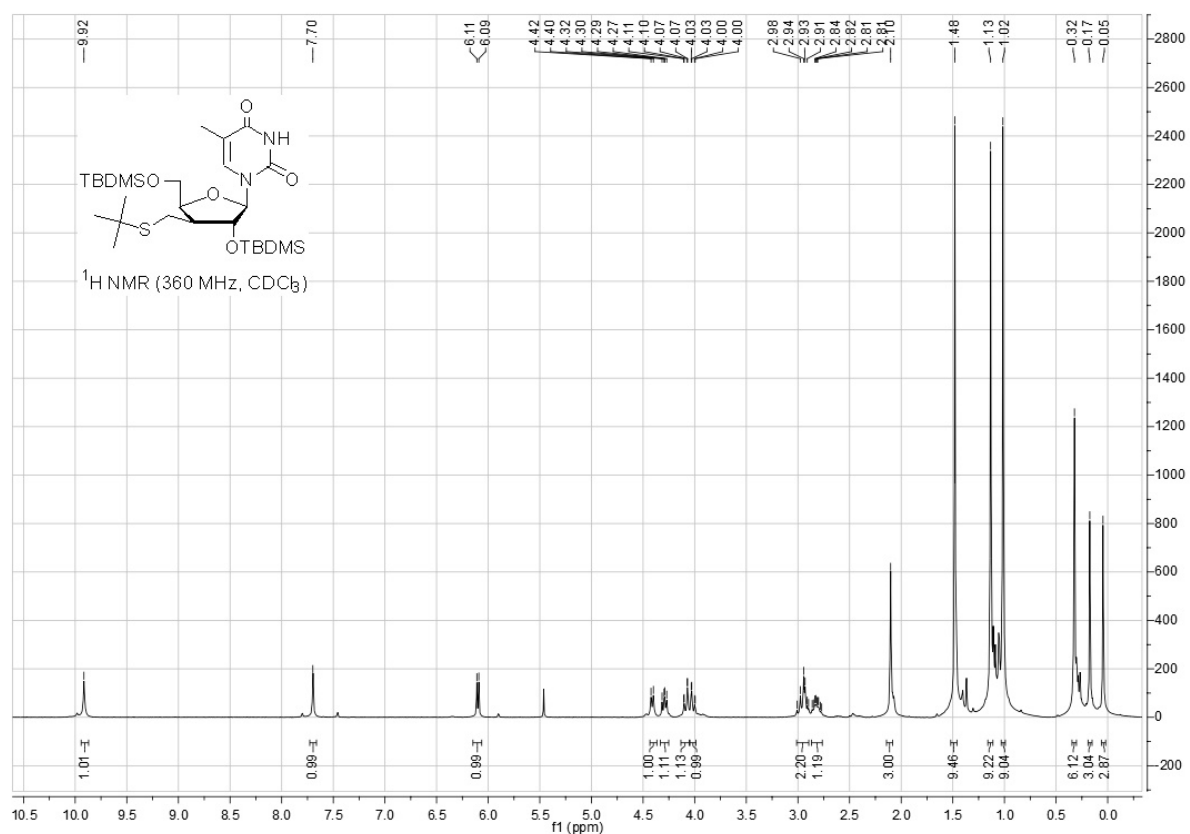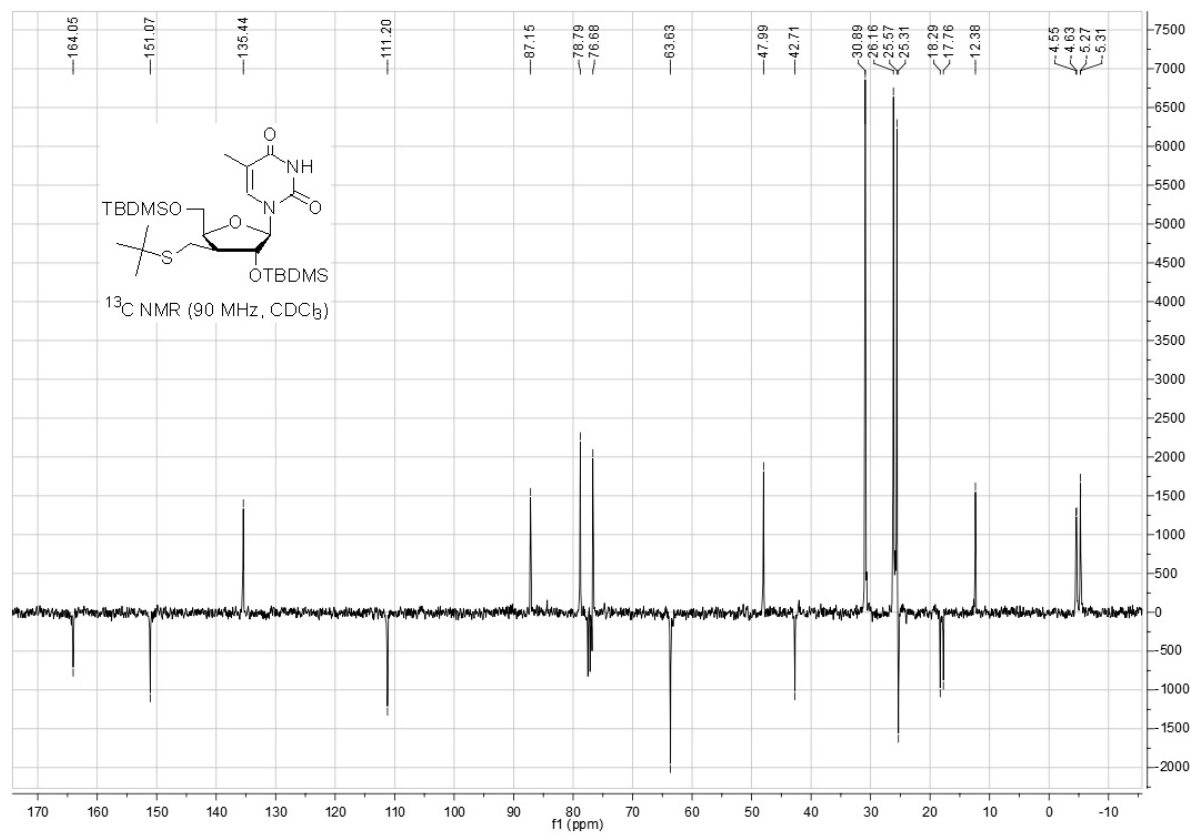

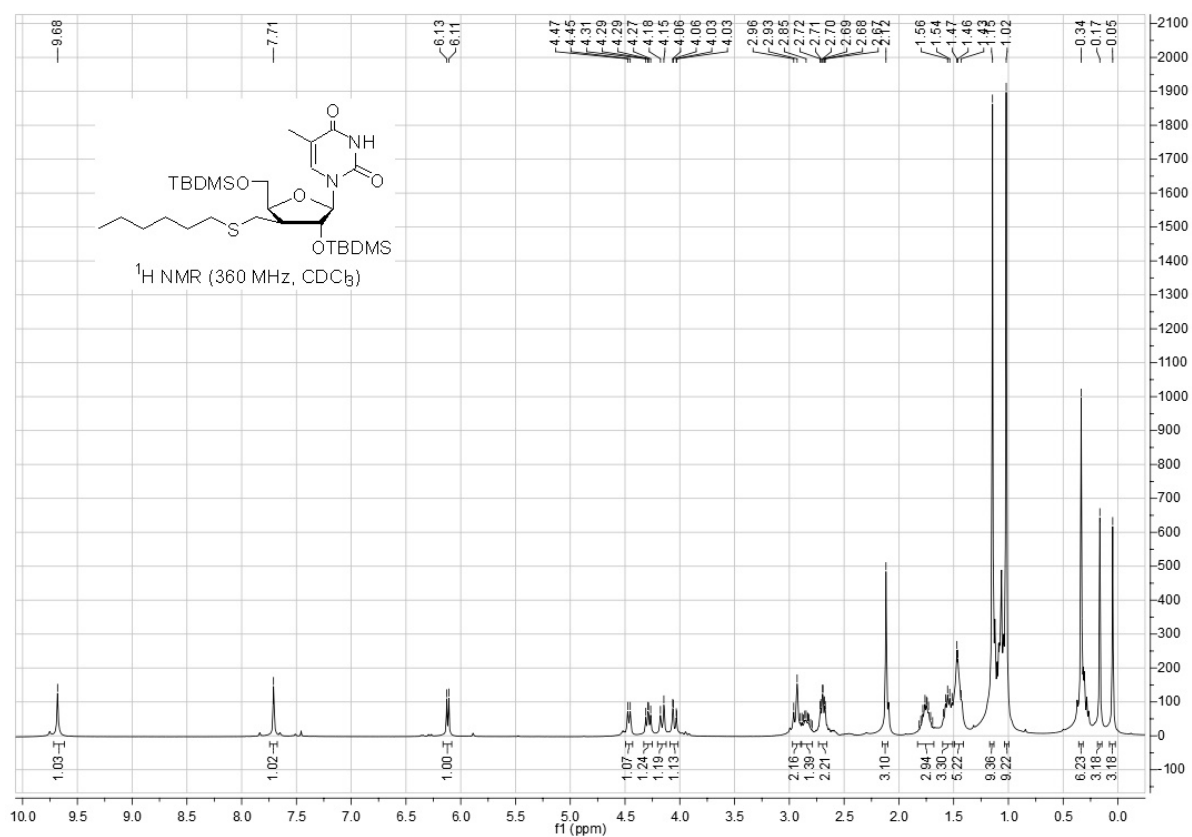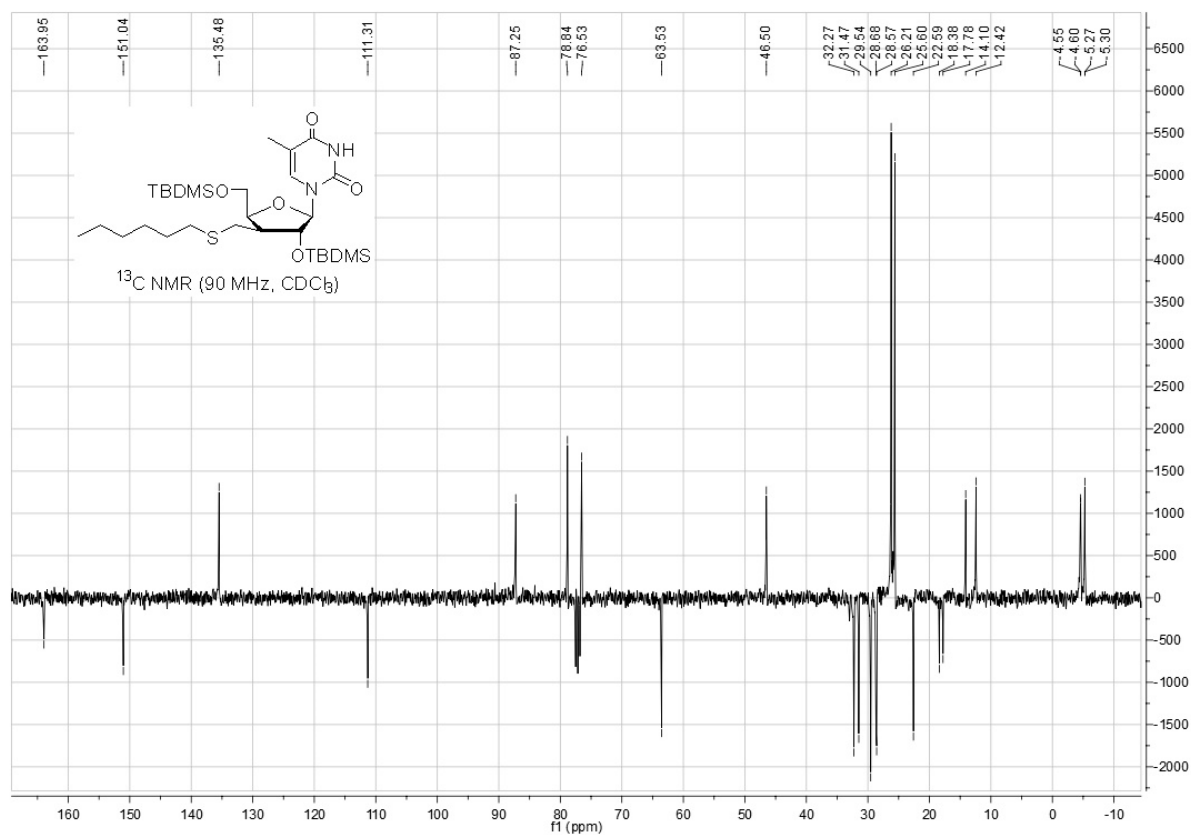

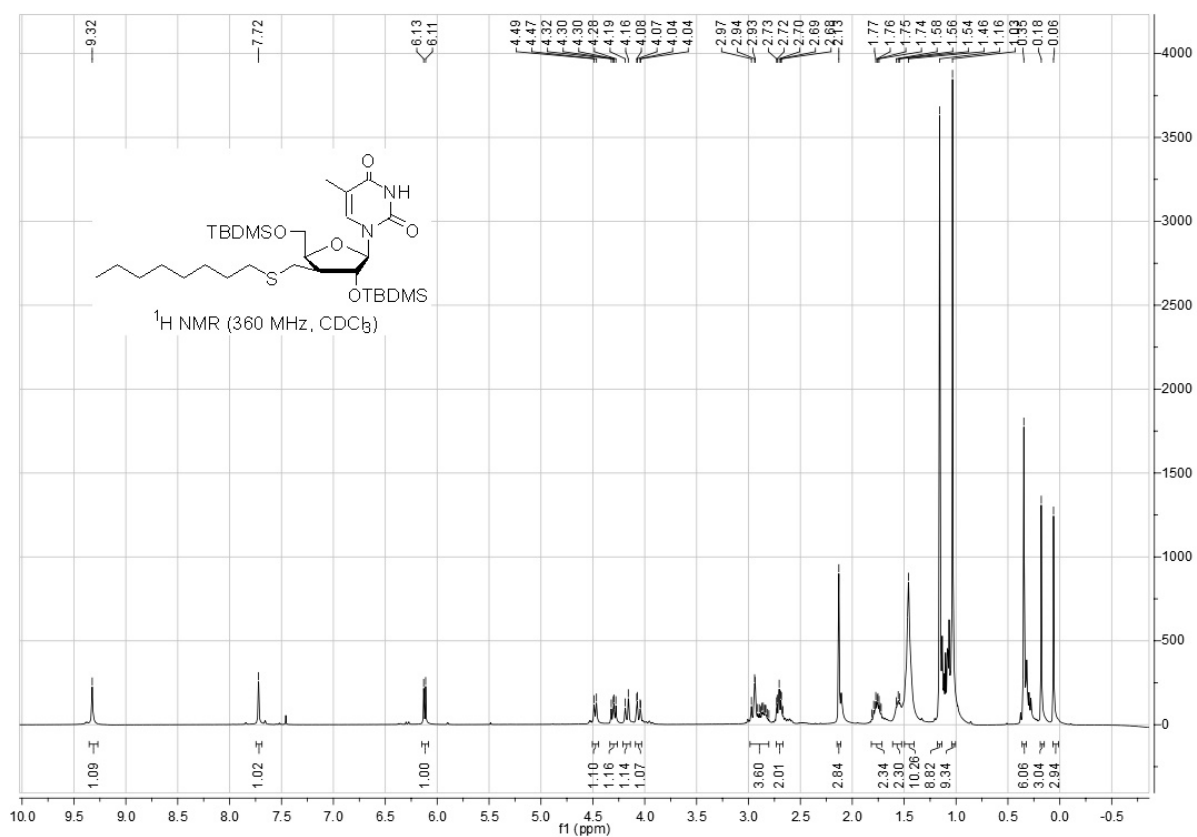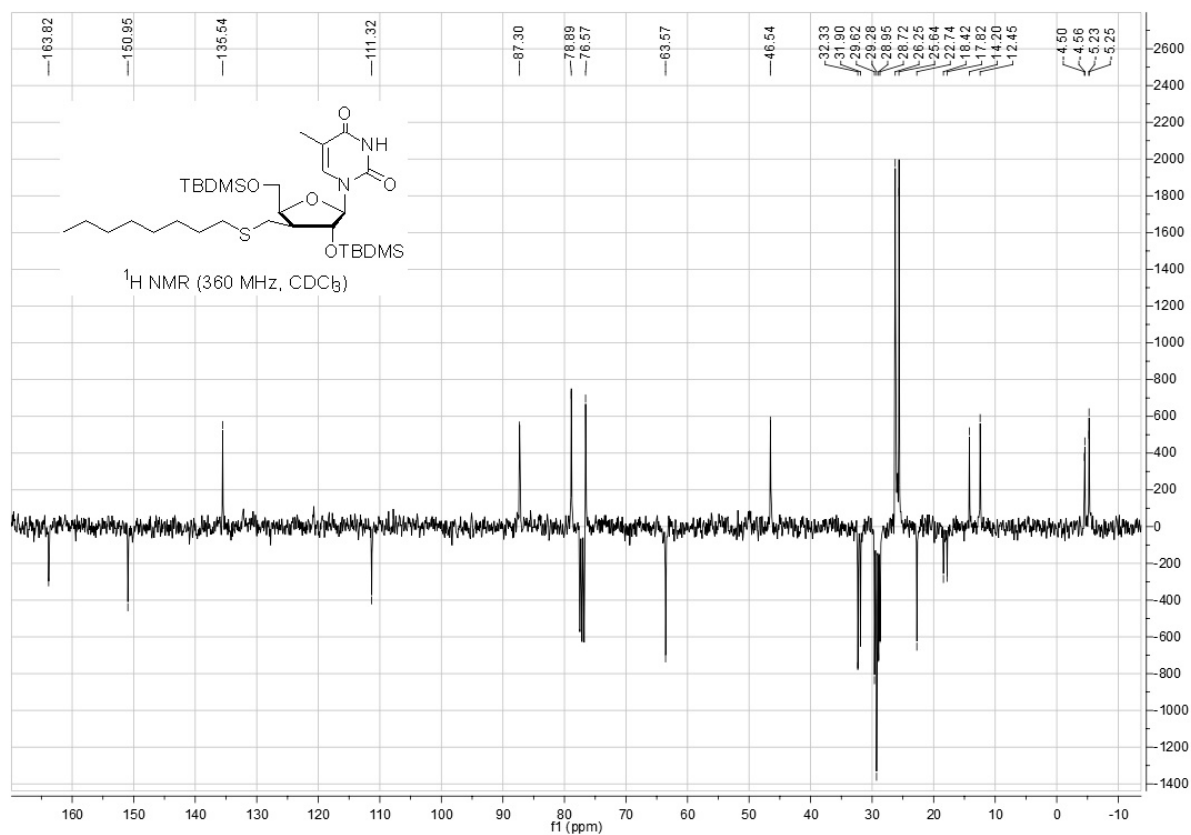

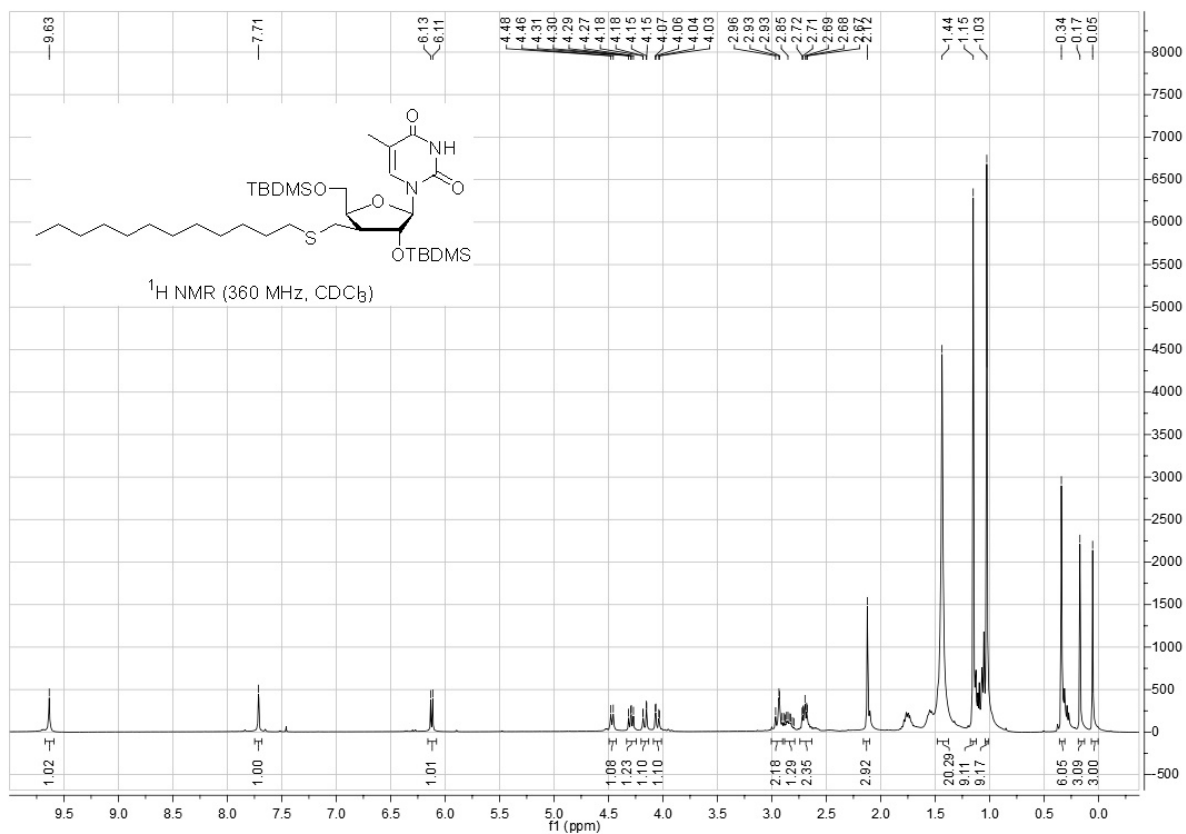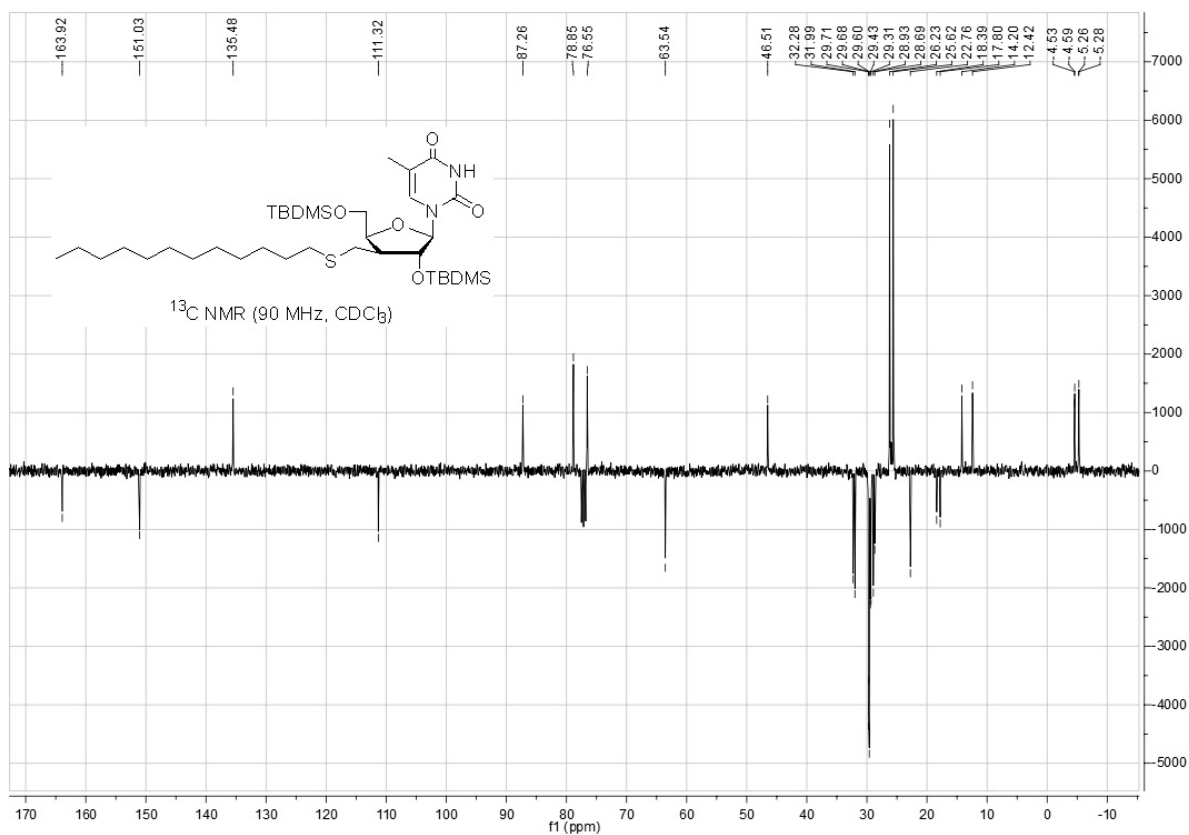

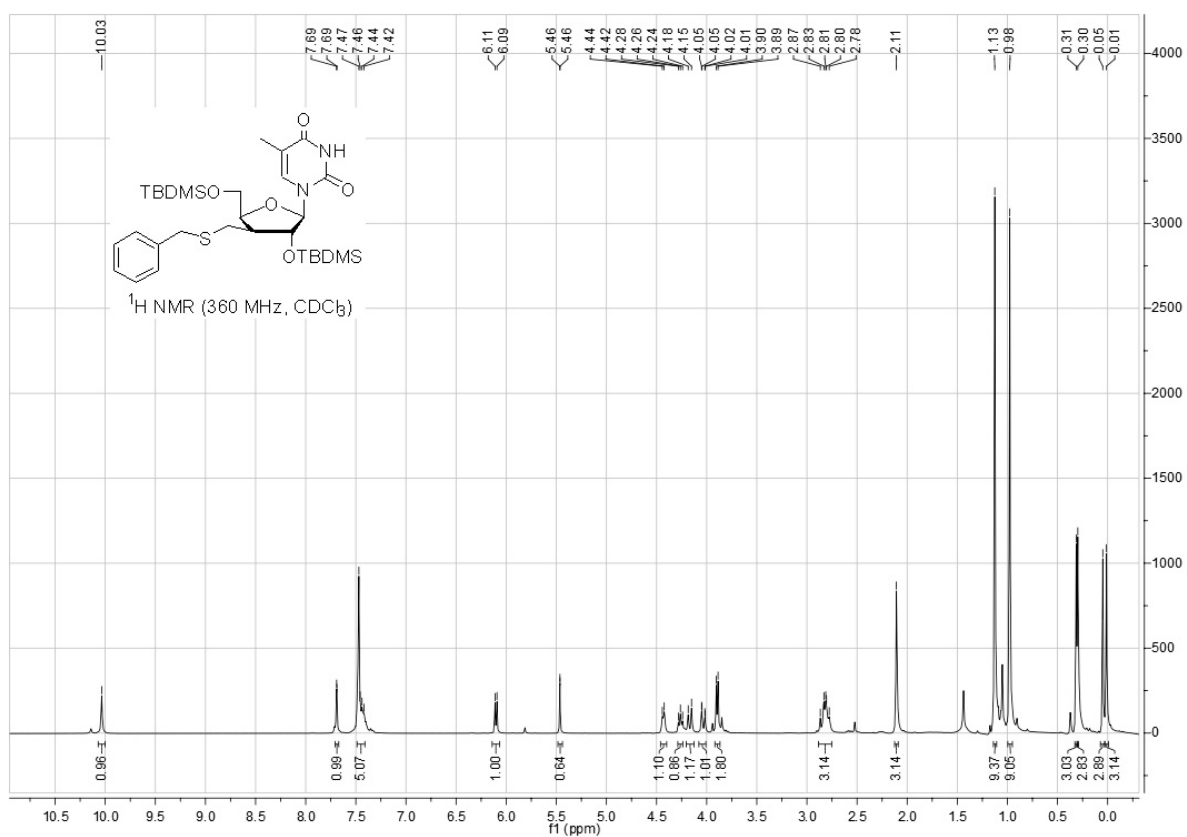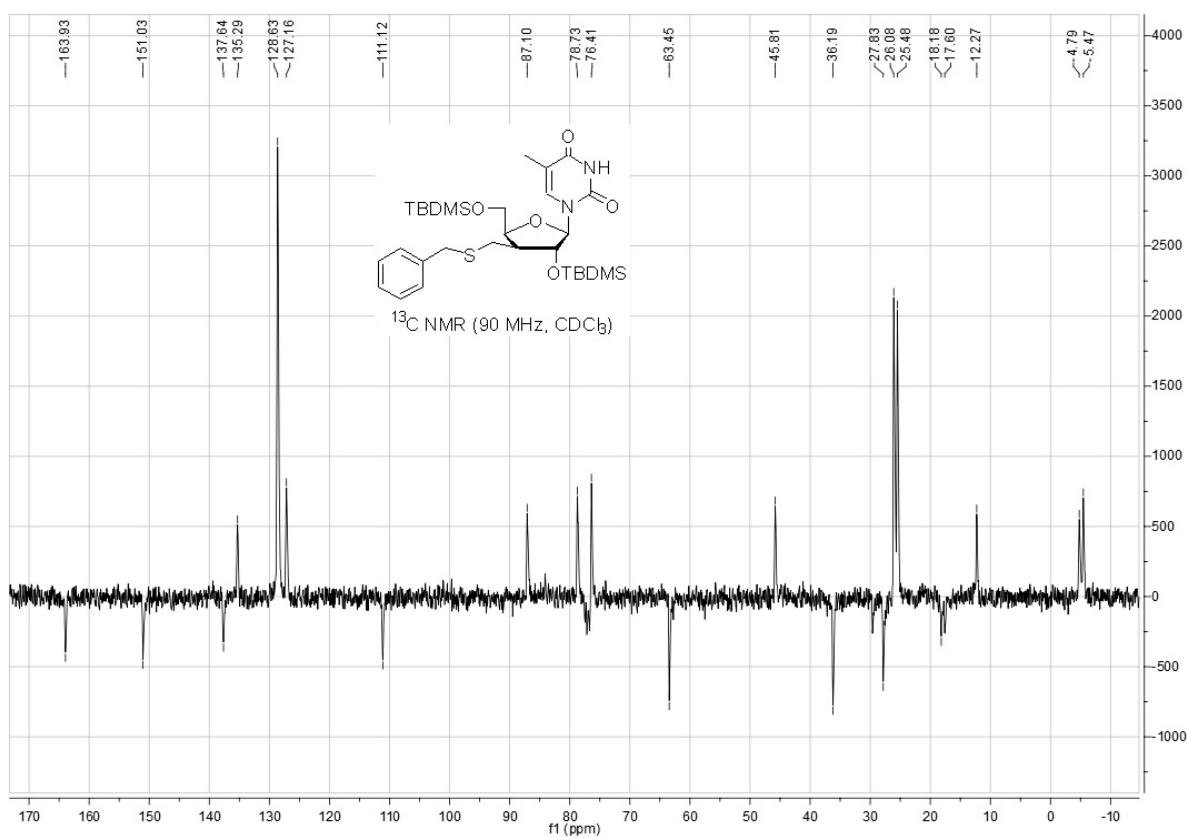

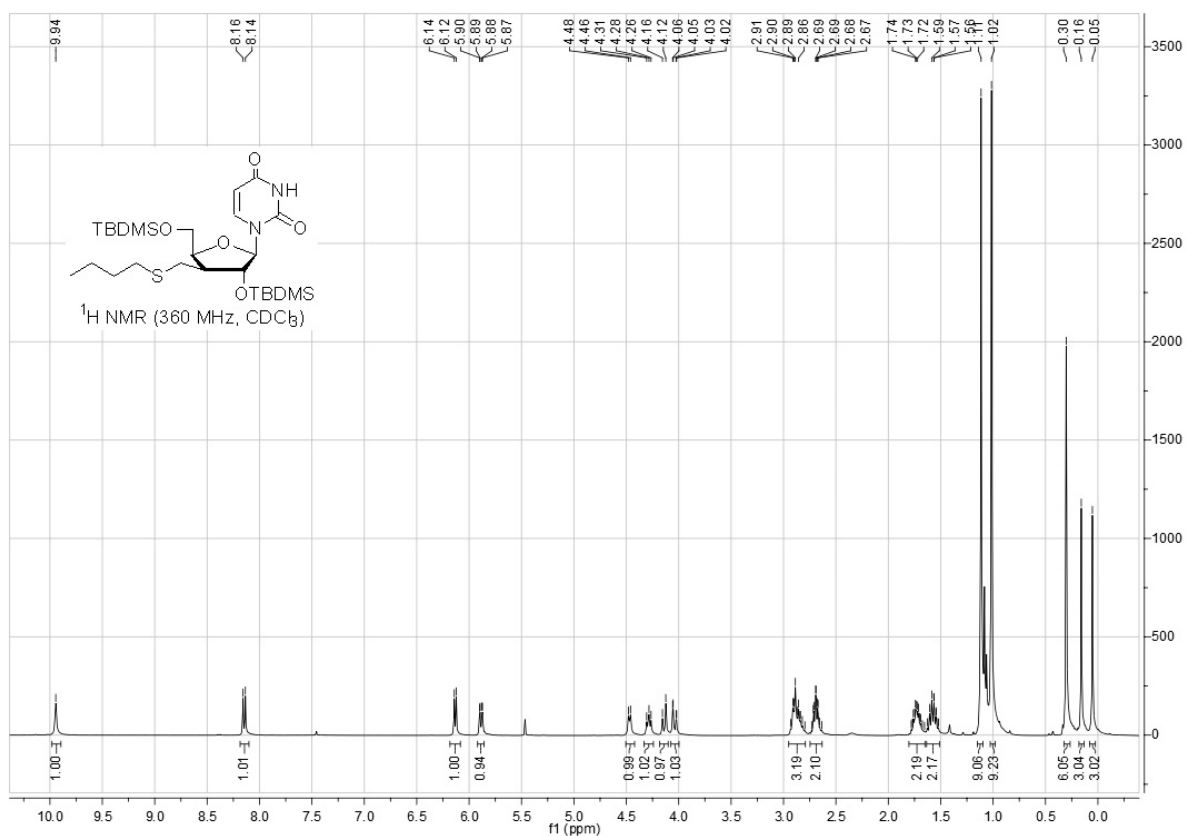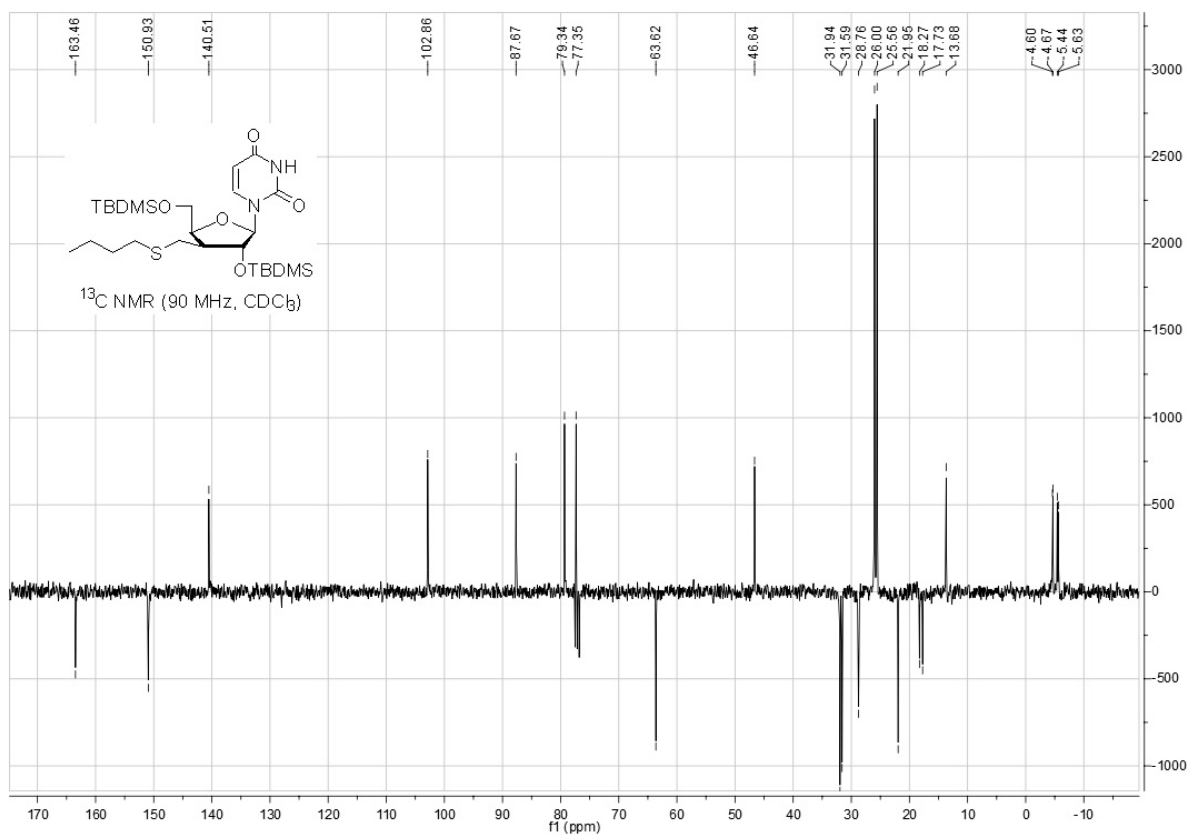

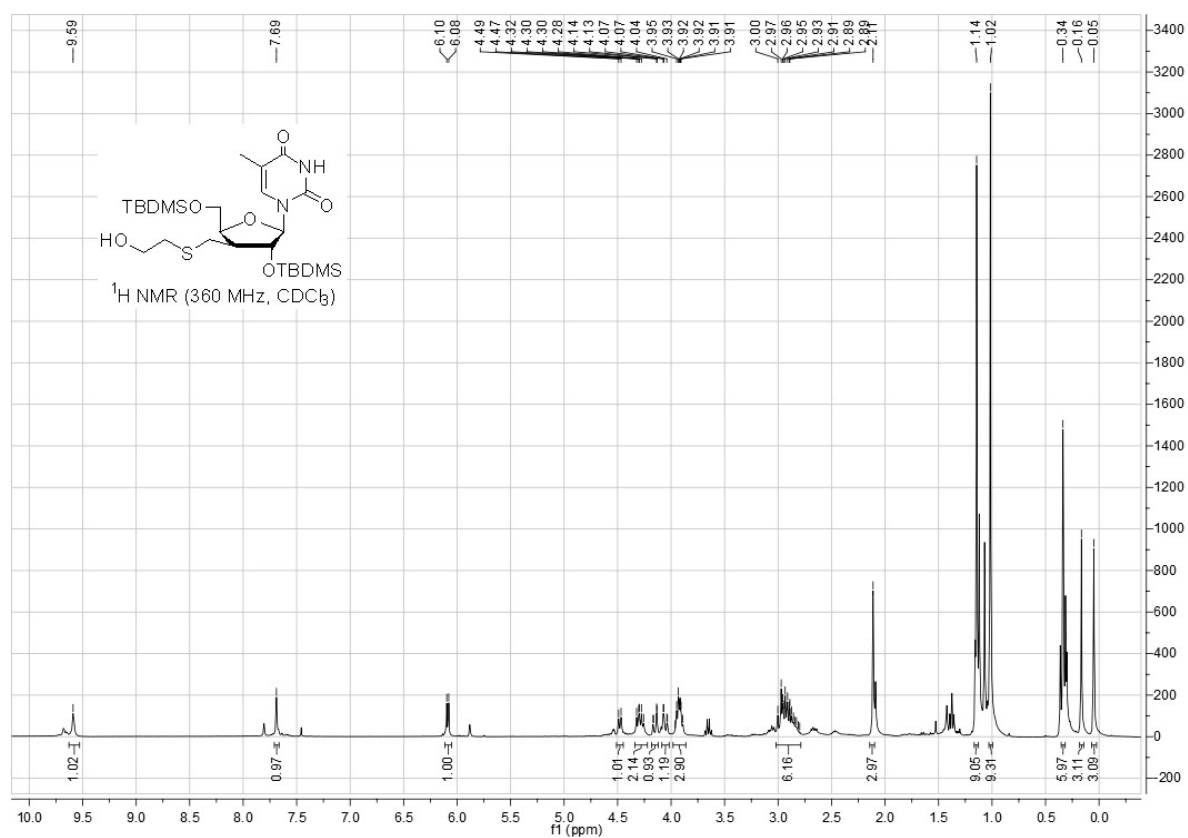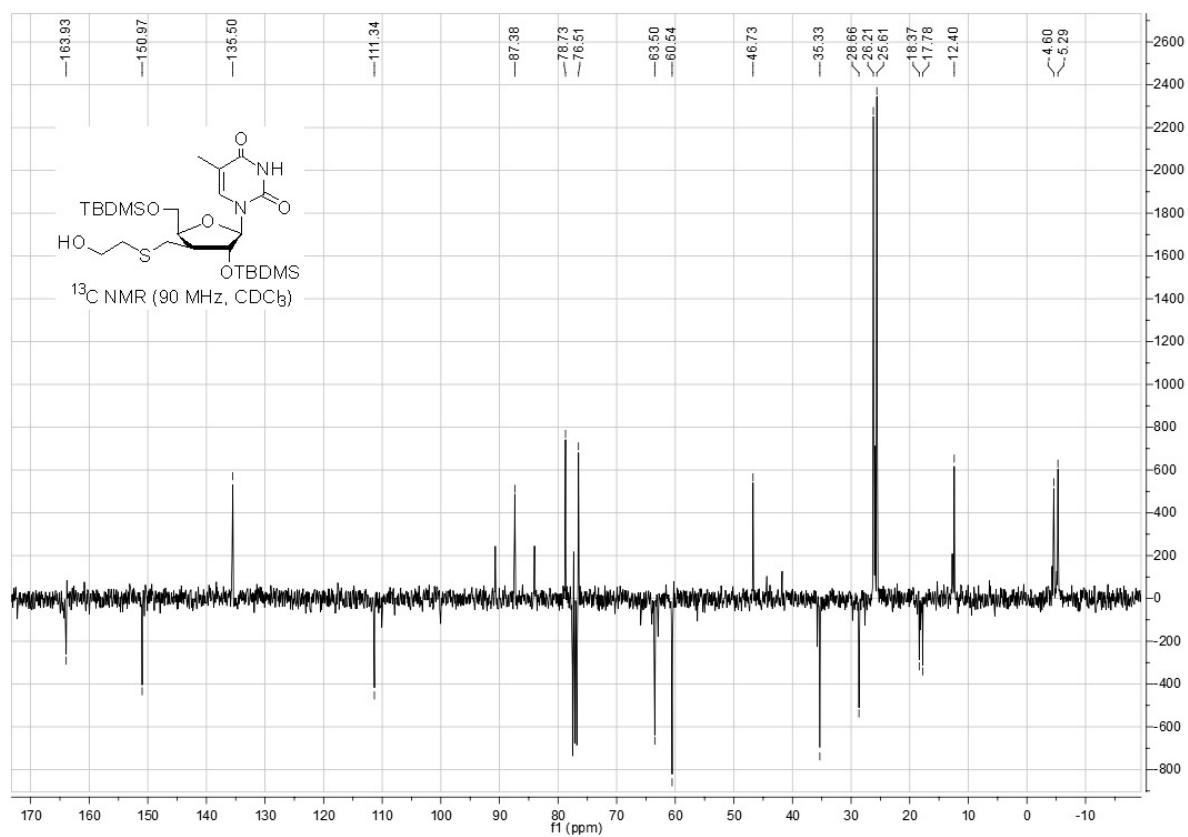



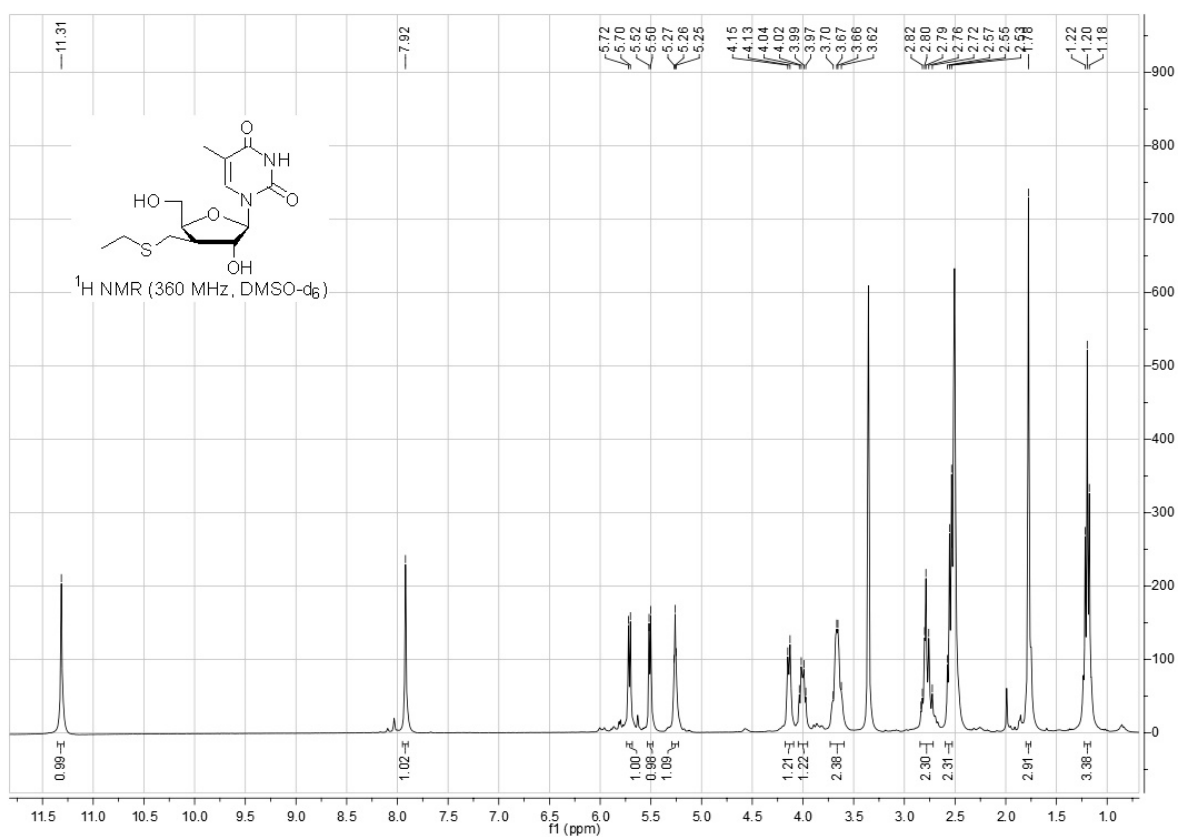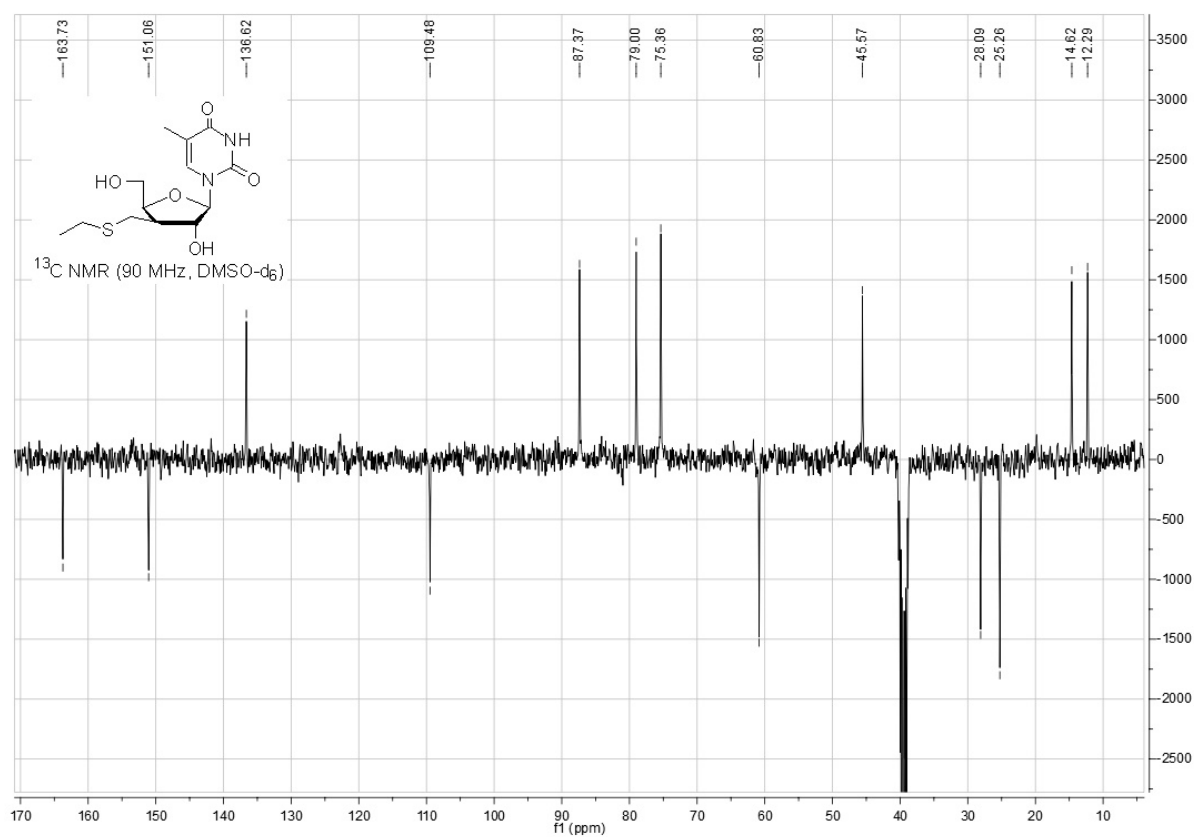

Supplement: s1 [file s1]
